# Supplementary material for: Occurrence, Pathogenicity, and Mycotoxin Production of Fusarium temperatum in Relation to Other Fusarium Species on Maize in Germany
Source: PubMed Central journal article supplement (PMC7690569; doi:10.3390/pathogens9110864), 2020-10-22
Supplement: pathogens-09-00864-s001.pdf [file pathogens-09-00864-s001.pdf]

1 **Supplementary Materials:**

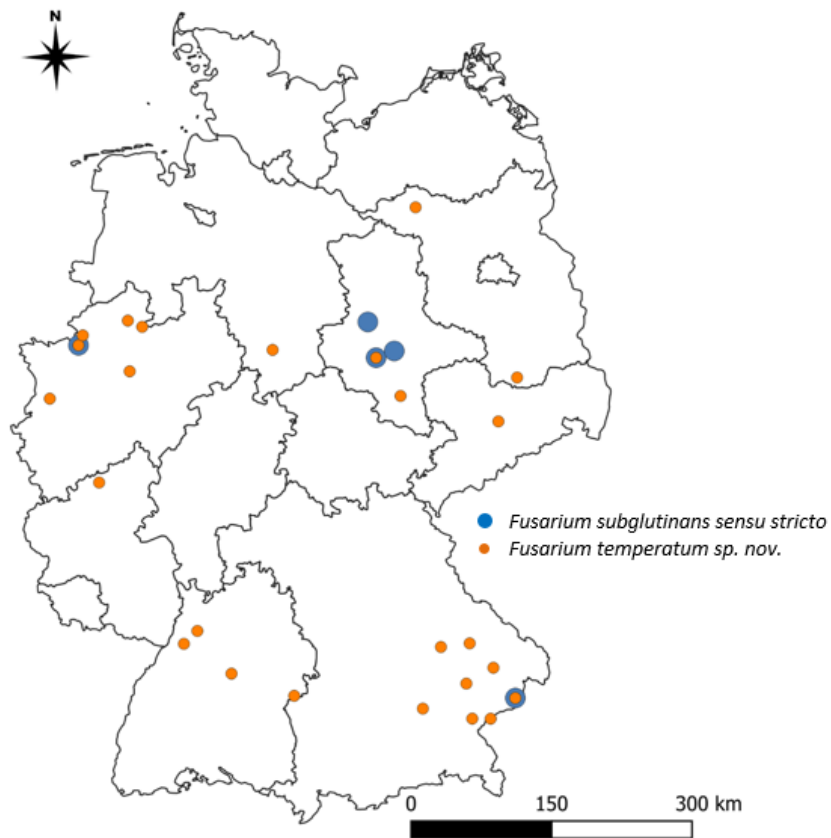

2  
3  
4

**Figure S1.** Sampling sites in Germany, where isolates were obtained from maize cobs with infection of *F. subglutinans* and/or *F. temperatum*.

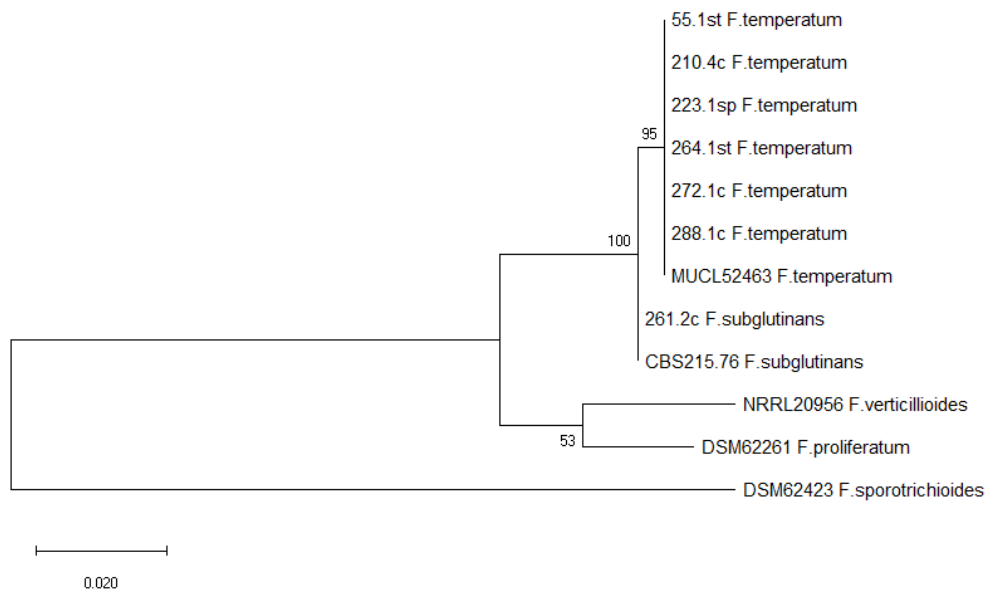

5  
6  
7  
8  
9

**Figure S2.** Molecular phylogenetic analysis of DNA-directed RNA polymerase II subunit (*rpb2*) by maximum likelihood method (1000 bootstrap replicates) [25]. Analysis was performed with ClustalW [25] in MEGA version 7.0.26 [26] with partial *rpb2* sequences of 6 isolates of *F. temperatum*, representing phylogenetic group 1 (55.1st, 210.4c, 223.1sp, 272.1c) and group 2 (264.1st, 288.1c) (Figure 1 & Table

10 S5), 1 isolate of *F. subglutinans*, and references for *F. temperatum* MUCL52463 and *F. subglutinans*  
11 CBS215.76 (Table S4). We added additional references DSM62261 *F. proliferatum*, NRRL20956  
12 *F. verticillioides* and DSM62423 *F. sporotrichioides* to scale phylogenetic separation. The tree is drawn to  
13 scale, with branch lengths measured in the number of substitutions per site. Bootstrap values are  
14 presented next to the nodes. Individual accession numbers are presented in Table S1.

15

16

17

18

19

20

21

22

23

24

25

26

27

28

29

30

31

32

33

34

35

36

37

38

39

**Table S1.** List of isolates of *F. temperatum* and *F. subglutinans* and selected isolates of *F. proliferatum*, and *F. verticillioides*, obtained from naturally infected maize cobs, during the present study.

| Isolate <sup>1</sup> | Maize organ  | Year        | Location     | Morphological characteristics        | Sequencing of <i>TEF-1<math>\alpha</math></i> | Accession numbers               |             |             |
|----------------------|--------------|-------------|--------------|--------------------------------------|-----------------------------------------------|---------------------------------|-------------|-------------|
|                      |              |             |              |                                      |                                               | <i>TEF-1<math>\alpha</math></i> | <i>RPB2</i> | <i>FUM1</i> |
| Ft 18.1              | rachis       | 2017        | Greven       | <i>F. subglutinans</i> s. lat        | <i>F. temperatum</i>                          | MW118553                        |             |             |
| Ft 18.5              | kernel       | 2017        | Greven       | <i>F. subglutinans</i> s. lat        | <i>F. temperatum</i>                          |                                 |             |             |
| Ft 21.6              | kernel       | 2017        | Greven       | <i>F. subglutinans</i> s. lat        | <i>F. temperatum</i>                          | MW118544                        |             |             |
| Ft 21.10             | kernel       | 2017        | Greven       | <i>F. subglutinans</i> s. lat        | <i>F. temperatum</i>                          |                                 |             |             |
| Ft 22.4              | stalk        | 2017        | Gondelsheim  | <i>F. subglutinans</i> s. lat        | <i>F. temperatum</i>                          | MW118536                        |             |             |
| Ft 50.2              | kernel       | 2017        | Muenzesheim  | <i>F. subglutinans</i> s. lat        | <i>F. temperatum</i>                          | MW118502                        |             | MW118590    |
| Ft 51.1              | rachis       | 2017        | Muenzesheim  | <i>F. subglutinans</i> s. lat        | <i>F. temperatum</i>                          |                                 |             |             |
| Ft 51.6              | stalk        | 2017        | Nossen       | <i>F. subglutinans</i> s. lat        | <i>F. temperatum</i>                          | MW118501                        |             |             |
| Ft 55.1              | stalk        | 2017        | Nossen       | <i>F. subglutinans</i> s. lat        | <i>F. temperatum</i>                          | MW118500                        | MW118577    |             |
| Ft 61.2              | kernel       | 2017        | Pocking      | <i>F. subglutinans</i> s. lat        | <i>F. temperatum</i>                          |                                 |             |             |
| Ft 62.1              | stalk        | 2017        | Borken       | <i>F. subglutinans</i> s. lat        | <i>F. temperatum</i>                          | MW118499                        |             |             |
| Ft 65.2              | kernel       | 2017        | Ostbeven     | <i>F. subglutinans</i> s. lat        | <i>F. temperatum</i>                          | MW118498                        |             |             |
| Ft 78.2              | stalk        | 2017        | Osterhofen   | <i>F. subglutinans</i> s. lat        | <i>F. temperatum</i>                          | MW118497                        |             |             |
| Ft 81.4              | stalk        | 2017        | Osterhofen   | <i>F. subglutinans</i> s. lat        | <i>F. temperatum</i>                          | MW118496                        |             |             |
| Ft 91.1              | stalk        | 2017        | Reith        | <i>F. subglutinans</i> s. lat        | <i>F. temperatum</i>                          | MW118495                        |             |             |
| Ft 93.2              | kernel       | 2017        | Lauchstaedt  | <i>F. subglutinans</i> s. lat        | <i>F. temperatum</i>                          | MW118494                        |             | MW118589    |
| Ft 98.4              | stalk        | 2017        | Wesel        | <i>F. subglutinans</i> s. lat        | <i>F. temperatum</i>                          | MW118493                        |             |             |
| Ft 99.3              | stalk        | 2017        | Wesel        | <i>F. subglutinans</i> s. lat        | <i>F. temperatum</i>                          | MW118492                        |             |             |
| Ft 104.3             | stalk        | 2017        | Loenningen   | <i>F. subglutinans</i> s. lat        | <i>F. temperatum</i>                          | MW118563                        |             |             |
| Ft 100.3             | stalk        | 2017        | Wesel        | <i>F. subglutinans</i> s. lat        | <i>F. temperatum</i>                          | MW118565                        |             |             |
| <b>Ft 101.2</b>      | <b>stalk</b> | <b>2017</b> | <b>Wesel</b> | <b><i>F. subglutinans</i> s. lat</b> | <b><i>F. temperatum</i></b>                   | MW118564                        |             |             |
| Ft 106.4             | stalk        | 2017        | Loenningen   | <i>F. subglutinans</i> s. lat        | <i>F. temperatum</i>                          | MW118562                        |             |             |
| Ft 115.2             | rachis       | 2017        | Moosham      | <i>F. subglutinans</i> s. lat        | <i>F. temperatum</i>                          | MW118561                        |             |             |
| Ft 117.1             | rachis       | 2017        | Moosham      | <i>F. subglutinans</i> s. lat        | <i>F. temperatum</i>                          | MW118560                        |             |             |
| Ft 127.2             | rachis       | 2017        | Borken       | <i>F. subglutinans</i> s. lat        | <i>F. temperatum</i>                          | MW118559                        |             |             |
| Ft 130.2             | rachis       | 2017        | Westum       | <i>F. subglutinans</i> s. lat        | <i>F. temperatum</i>                          | MW118558                        |             |             |
| Ft 160.4             | kernel       | 2017        | Osterhoven   | <i>F. subglutinans</i> s. lat        | <i>F. temperatum</i>                          | MW118557                        |             |             |
| Ft 161.2             | kernel       | 2017        | Osterhoven   | <i>F. subglutinans</i> s. lat        | <i>F. temperatum</i>                          | MW118556                        |             |             |

|                 |               |             |                  |                                      |                             |                 |          |
|-----------------|---------------|-------------|------------------|--------------------------------------|-----------------------------|-----------------|----------|
| Ft 170.1        | kernel        | 2017        | Wesel            | <i>F. subglutinans</i> s. lat        | <i>F. temperatum</i>        | MW118555        |          |
| Ft 172.2        | kernel        | 2017        | Wesel            | <i>F. subglutinans</i> s. lat        | <i>F. temperatum</i>        | MW118554        |          |
| Ft 175.1        | kernel        | 2017        | Loenningen       | <i>F. subglutinans</i> s. lat        | <i>F. temperatum</i>        |                 |          |
| Ft 178.1        | kernel        | 2017        | Toenisvorst      | <i>F. subglutinans</i> s. lat        | <i>F. temperatum</i>        |                 |          |
| Ft 180.4        | rachis        | 2017        | Toenisvorst      | <i>F. subglutinans</i> s. lat        | <i>F. temperatum</i>        | MW118552        |          |
| Ft 184.2        | kernel        | 2017        | Plessa           | <i>F. subglutinans</i> s. lat        | <i>F. temperatum</i>        | MW118551        |          |
| Ft 185.6        | rachis        | 2017        | Plessa           | <i>F. subglutinans</i> s. lat        | <i>F. temperatum</i>        | MW118550        |          |
| Ft 188.2        | kernel        | 2017        | Pritzwalk        | <i>F. subglutinans</i> s. lat        | <i>F. temperatum</i>        | MW118549        |          |
| Ft 202.1        | stalk         | 2018        | Goettingen       | <i>F. subglutinans</i> s. lat        | <i>F. temperatum</i>        | MW118548        | MW118591 |
| Ft 205.1        | stalk         | 2018        | Mintraching      | <i>F. subglutinans</i> s. lat        | <i>F. temperatum</i>        | MW118547        |          |
| Ft 208.2        | rachis        | 2018        | Braunau          | <i>F. subglutinans</i> s. lat        | <i>F. temperatum</i>        |                 |          |
| Ft 208.3        | kernel        | 2018        | Braunau          | <i>F. subglutinans</i> s. lat        | <i>F. temperatum</i>        | MW118546        |          |
| Ft 208.5        | kernel        | 2018        | Braunau          | <i>F. subglutinans</i> s. lat        | <i>F. temperatum</i>        |                 |          |
| Ft 208.6        | kernel        | 2018        | Braunau          | <i>F. subglutinans</i> s. lat        | <i>F. temperatum</i>        |                 |          |
| Ft 208.1        | rachis        | 2018        | Braunau          | <i>F. subglutinans</i> s. lat        | <i>F. temperatum</i>        |                 |          |
| Ft 209.6        | kernel        | 2018        | Hohenheim        | <i>F. subglutinans</i> s. lat        | <i>F. temperatum</i>        | MW118545        |          |
| Ft 210.4        | kernel        | 2018        | Hohenheim        | <i>F. subglutinans</i> s. lat        | <i>F. temperatum</i>        | MW118543        | MW118578 |
| Ft 210.7        | stalk         | 2018        | Pocking          | <i>F. subglutinans</i> s. lat        | <i>F. temperatum</i>        | MW118542        |          |
| Ft 211.1        | kernel        | 2018        | Hohenheim        | <i>F. subglutinans</i> s. lat        | <i>F. temperatum</i>        | MW118541        |          |
| <b>Ft 211.1</b> | <b>rachis</b> | <b>2018</b> | <b>Hohenheim</b> | <b><i>F. subglutinans</i> s. lat</b> | <b><i>F. temperatum</i></b> | <b>MW118540</b> |          |
| Ft 212.1        | kernel        | 2018        | Hohenheim        | <i>F. subglutinans</i> s. lat        | <i>F. temperatum</i>        | MW118539        |          |
| Ft 213.2        | kernel        | 2018        | Hohenheim        | <i>F. subglutinans</i> s. lat        | <i>F. temperatum</i>        | MW118538        |          |
| Ft 213.6        | stalk         | 2018        | Pocking          | <i>F. subglutinans</i> s. lat        | <i>F. temperatum</i>        | MW118537        |          |
| Ft 223.1        | rachis        | 2018        | Pocking          | <i>F. subglutinans</i> s. lat        | <i>F. temperatum</i>        | MW118535        | MW118579 |
| Ft 224.2        | kernel        | 2018        | Pocking          | <i>F. subglutinans</i> s. lat        | <i>F. temperatum</i>        | MW118534        |          |
| Ft 224.5        | kernel        | 2018        | Pocking          | <i>F. subglutinans</i> s. lat        | <i>F. temperatum</i>        |                 |          |
| <b>Ft 229.2</b> | <b>rachis</b> | <b>2018</b> | <b>Einbeck</b>   | <b><i>F. subglutinans</i> s. lat</b> | <b><i>F. temperatum</i></b> | <b>MW118533</b> |          |
| Ft 232.1        | stalk         | 2018        | Einbeck          | <i>F. subglutinans</i> s. lat        | <i>F. temperatum</i>        | MW118532        |          |
| Ft 235.3        | rachis        | 2018        | Frauenberg       | <i>F. subglutinans</i> s. lat        | <i>F. temperatum</i>        | MW118531        |          |
| Ft 238.3        | stalk         | 2018        | Frauenberg       | <i>F. subglutinans</i> s. lat        | <i>F. temperatum</i>        | MW118530        |          |
| Ft 240.4        | kernel        | 2018        | Ulm Langenau     | <i>F. subglutinans</i> s. lat        | <i>F. temperatum</i>        | MW118529        |          |
| Ft 244.5        | stalk         | 2018        | Ulm Langenau     | <i>F. subglutinans</i> s. lat        | <i>F. temperatum</i>        | MW118528        |          |
| Ft 245.1        | stalk         | 2018        | Ulm Langenau     | <i>F. subglutinans</i> s. lat        | <i>F. temperatum</i>        |                 |          |
| Ft 246.1        | kernel        | 2018        | Ulm Langenau     | <i>F. subglutinans</i> s. lat        | <i>F. temperatum</i>        | MW118527        |          |
| Ft 247.2        | kernel        | 2018        | Ulm Langenau     | <i>F. subglutinans</i> s. lat        | <i>F. temperatum</i>        | MW118525        |          |

|          |        |      |                |                               |                               |                            |
|----------|--------|------|----------------|-------------------------------|-------------------------------|----------------------------|
| Ft 247.1 | rachis | 2018 | Ulm Langenau   | <i>F. subglutinans</i> s. lat | <i>F. temperatum</i>          |                            |
| Ft 247.1 | stalk  | 2018 | Mintraching    | <i>F. subglutinans</i> s. lat | <i>F. temperatum</i>          | MW118526                   |
| Ft 251.3 | stalk  | 2018 | Wesel          | <i>F. subglutinans</i> s. lat | <i>F. temperatum</i>          | MW118524                   |
| Ft 252.1 | stalk  | 2018 | Wesel          | <i>F. subglutinans</i> s. lat | <i>F. temperatum</i>          | MW118523                   |
| Ft 261.1 | stalk  | 2018 | Toenisvorst    | <i>F. subglutinans</i> s. lat | <i>F. temperatum</i>          | MW118522                   |
| Ft 263.5 | stalk  | 2018 | Ostbevern      | <i>F. subglutinans</i> s. lat | <i>F. temperatum</i>          | MW118521                   |
| Ft 264.1 | stalk  | 2018 | Ostbevern      | <i>F. subglutinans</i> s. lat | <i>F. temperatum</i>          | MW118520 MW118580 MW118592 |
| Ft 270.3 | stalk  | 2018 | Osterhofen     | <i>F. subglutinans</i> s. lat | <i>F. temperatum</i>          | MW118519                   |
| Ft 272.1 | kernel | 2018 | Pocking        | <i>F. subglutinans</i> s. lat | <i>F. temperatum</i>          | MW118518 MW118581          |
| Ft 272.1 | rachis | 2018 | Pocking        | <i>F. subglutinans</i> s. lat | <i>F. temperatum</i>          | MW118517                   |
| Ft 274.1 | kernel | 2018 | Wesel          | <i>F. subglutinans</i> s. lat | <i>F. temperatum</i>          | MW118516                   |
| Ft 275.1 | kernel | 2018 | Wesel          | <i>F. subglutinans</i> s. lat | <i>F. temperatum</i>          | MW118515                   |
| Ft 275.1 | rachis | 2018 | Wesel          | <i>F. subglutinans</i> s. lat | <i>F. temperatum</i>          | MW118514                   |
| Ft 275.3 | kernel | 2018 | Wesel          | <i>F. subglutinans</i> s. lat | <i>F. temperatum</i>          |                            |
| Ft 280.2 | kernel | 2018 | Toenisvorst    | <i>F. subglutinans</i> s. lat | <i>F. temperatum</i>          | MW118513                   |
| Ft 280.4 | kernel | 2018 | Toenisvorst    | <i>F. subglutinans</i> s. lat | <i>F. temperatum</i>          |                            |
| Ft 280.2 | stalk  | 2018 | Altoetting     | <i>F. subglutinans</i> s. lat | <i>F. temperatum</i>          | MW118512                   |
| Ft 281.2 | kernel | 2018 | Loeningen      | <i>F. subglutinans</i> s. lat | <i>F. temperatum</i>          | MW118511                   |
| Ft 281.2 | rachis | 2018 | Loeningen      | <i>F. subglutinans</i> s. lat | <i>F. temperatum</i>          | MW118510                   |
| Ft 282.1 | kernel | 2018 | Loenningen     | <i>F. subglutinans</i> s. lat | <i>F. temperatum</i>          | MW118509                   |
| Ft 282.1 | rachis | 2018 | Loeningen      | <i>F. subglutinans</i> s. lat | <i>F. temperatum</i>          | MW118508                   |
| Ft 282.2 | kernel | 2018 | Loenningen     | <i>F. subglutinans</i> s. lat | <i>F. temperatum</i>          |                            |
| Ft 285.1 | kernel | 2018 | Ostbevern      | <i>F. subglutinans</i> s. lat | <i>F. temperatum</i>          |                            |
| Ft 285.1 | rachis | 2018 | Ostbevern      | <i>F. subglutinans</i> s. lat | <i>F. temperatum</i>          |                            |
| Ft 286.1 | rachis | 2018 | Ostbevern      | <i>F. subglutinans</i> s. lat | <i>F. temperatum</i>          | MW118507                   |
| Ft 287.1 | kernel | 2018 | Ostbevern      | <i>F. subglutinans</i> s. lat | <i>F. temperatum</i>          |                            |
| Ft 287.1 | rachis | 2018 | Ostbevern      | <i>F. subglutinans</i> s. lat | <i>F. temperatum</i>          | MW118506                   |
| Ft 288.1 | rachis | 2018 | Ostbevern      | <i>F. subglutinans</i> s. lat | <i>F. temperatum</i>          |                            |
| Ft 288.1 | kernel | 2018 | Ostbevern      | <i>F. subglutinans</i> s. lat | <i>F. temperatum</i>          | MW118505 MW118582          |
| Ft296.3  | rachis | 2018 | Altoetting     | <i>F. subglutinans</i> s. lat | <i>F. temperatum</i>          | MW118504                   |
| Ft 298.1 | kernel | 2018 | Altoetting     | <i>F. subglutinans</i> s. lat | <i>F. temperatum</i>          | MW118503                   |
| Fs 28.1  | kernel | 2017 | Bernburg       | <i>F. subglutinans</i> s. lat | <i>F. subglutinans</i> s.str. | MW118567                   |
| Fs 28.4  | rachis | 2017 | Bernburg       | <i>F. subglutinans</i> s. lat | <i>F. subglutinans</i> s.str. | MW118566                   |
| Fs 126.2 | kernel | 2017 | Borken         | <i>F. subglutinans</i> s. lat | <i>F. subglutinans</i> s.str. | MW118572                   |
| Fs 187.1 | kernel | 2017 | Kleinwanzleben | <i>F. subglutinans</i> s. lat | <i>F. subglutinans</i> s.str. | MW118571                   |
| Fs 209.4 | stalk  | 2018 | Pocking        | <i>F. subglutinans</i> s. lat | <i>F. subglutinans</i> s.str. | MW118570                   |

|          |        |      |                |                               |                               |          |          |
|----------|--------|------|----------------|-------------------------------|-------------------------------|----------|----------|
| Fs 215.6 | kernel | 2018 | Kleinwanzleben | <i>F. subglutinans</i> s. lat | <i>F. subglutinans</i> s.str. |          |          |
| Fs 261.2 | kernel | 2018 | Mintraching    | <i>F. subglutinans</i> s. lat | <i>F. subglutinans</i> s.str. | MW118569 | MW118583 |
| Fs 262.1 | kernel | 2018 | Pocking        | <i>F. subglutinans</i> s. lat | <i>F. subglutinans</i> s.str. | MW118568 | MW118588 |
| Fp 55.9  | kernel | 2017 | Pocking        | <i>F. proliferatum</i>        | <i>F. proliferatum</i>        | MW118573 |          |
| Fp 201.1 | kernel | 2018 | Mintraching    | <i>F. proliferatum</i>        | <i>F. proliferatum</i>        |          | MW118594 |
| Fp 209.2 | stalk  | 2018 | Pocking        | <i>F. proliferatum</i>        | <i>F. proliferatum</i>        |          |          |
| Fp 239.6 | kernel | 2018 | Grucking       | <i>F. proliferatum</i>        | <i>F. proliferatum</i>        |          |          |
| Fp 273.1 | stalk  | 2018 | Osterhofen     | <i>F. proliferatum</i>        | <i>F. proliferatum</i>        | MW118574 |          |
| Fv 39.4  | kernel | 2017 | Neupotz        | <i>F. verticillioides</i>     | <i>F. verticillioides</i>     | MW118575 |          |
| Fv 205.9 | kernel | 2018 | Mariaposching  | <i>F. verticillioides</i>     | <i>F. verticillioides</i>     | MW118576 |          |
| Fv 208.3 | kernel | 2018 | Braunau        | <i>F. verticillioides</i>     | <i>F. verticillioides</i>     |          | MW118593 |
| Fv 236.2 | stalk  | 2018 | Grucking       | <i>F. verticillioides</i>     | <i>F. verticillioides</i>     |          |          |
| Fv 263.2 | kernel | 2018 | Pocking        | <i>F. verticillioides</i>     | <i>F. verticillioides</i>     |          |          |

42 <sup>1</sup> Abbreviations of species: Ft = *F. temperatum*, Fs = *F. subglutinans*, Fp = *F. proliferatum*, and Fv = *F. verticillioides*.

**Table S2.** Multiple variance analyses (year, location, method, variety) and interactions on disease severity of *Fusarium* species on maize cobs under field conditions in 2018 and 2019.

| Effect                             | Degr. of Freedom | F-value | p-value  |
|------------------------------------|------------------|---------|----------|
| Year                               | 1                | 68,751  | 0,000000 |
| Location                           | 3                | 32,382  | 0,000000 |
| Method                             | 1                | 318,813 | 0,000000 |
| Variety                            | 19               | 114,409 | 0,000000 |
| Year x Location                    | 3                | 11,160  | 0,000000 |
| Year x Method                      | 1                | 15,651  | 0,000076 |
| Location x Method                  | 3                | 97,979  | 0,000000 |
| Year x Variety                     | 19               | 12,207  | 0,000000 |
| Location x Variety                 | 57               | 4,285   | 0,000000 |
| Method x Variety                   | 19               | 43,685  | 0,000000 |
| Year x Location x Method           | 3                | 21,903  | 0,000000 |
| Year x Location x Variety          | 57               | 3,876   | 0,000000 |
| Year x Method x Variety            | 19               | 9,093   | 0,000000 |
| Location x Method x Variety        | 57               | 4,942   | 0,000000 |
| Year x Location x Method x Variety | 57               | 3,048   | 0,000000 |
| Error                              | 33705            |         |          |

**Table S3.** Multiple variance analyses (temperature, isolate, variety) and interactions on disease severity of *F. temperatum* and *F. subglutinans* on maize cobs under greenhouse conditions at five different temperatures.

| Effect                      | Effect on kernels infection |    |          | Effect on rachis infection |    |          |
|-----------------------------|-----------------------------|----|----------|----------------------------|----|----------|
|                             | SS                          | FG | p-value  | SS                         | FG | p-value  |
| Temperature                 | 4,3380                      | 4  | 0,008151 | 18,4010                    | 4  | 0,000000 |
| Isolate                     | 4,2537                      | 2  | 0,000892 | 2,8193                     | 2  | 0,010587 |
| Variety                     | 5,3634                      | 1  | 0,000035 | 5,9246                     | 1  | 0,000016 |
| Temperature*Isolate         | 6,8303                      | 8  | 0,005027 | 5,6802                     | 8  | 0,019797 |
| Temperature*Variety         | 1,4350                      | 4  | 0,313567 | 2,7728                     | 4  | 0,061330 |
| Isolate*Variety             | 2,4368                      | 2  | 0,018560 | 1,4574                     | 2  | 0,093004 |
| Temperature*Isolate*Variety | 2,0514                      | 8  | 0,555614 | 2,8282                     | 8  | 0,321599 |

**Table S4.** Sequence variations of partial *TEF-1 $\alpha$*  gene in isolates of *F. temperatum*.

| <i>TEF-1<math>\alpha</math></i> Genotypes | Isolates        | SNPs                  |            | Identical reference and accession <sup>3</sup> | Phylogenetic group <sup>4</sup> |
|-------------------------------------------|-----------------|-----------------------|------------|------------------------------------------------|---------------------------------|
|                                           |                 | Position <sup>2</sup> | Nucleotide |                                                |                                 |
| 1                                         | 28 <sup>1</sup> | 136                   | G          | MUCL52436<br>HM067684                          | 1                               |
|                                           |                 | 142                   | A          |                                                |                                 |
|                                           |                 | 325                   | A          |                                                |                                 |
|                                           |                 | 390                   | C          |                                                |                                 |
|                                           |                 | 455                   | T          |                                                |                                 |
| 2                                         | 3               | 136                   | A          | MUCL52454<br>HM067689                          | 1                               |
|                                           |                 | 142                   | G          |                                                |                                 |
|                                           |                 | 325                   | A          |                                                |                                 |
|                                           |                 | 390                   | C          |                                                |                                 |
|                                           |                 | 455                   | T          |                                                |                                 |
| 3                                         | 6               | 136                   | A          | MUCL52462<br>HM067690                          | 2                               |
|                                           |                 | 142                   | G          |                                                |                                 |
|                                           |                 | 325                   | T          |                                                |                                 |
|                                           |                 | 390                   | C          |                                                |                                 |
|                                           |                 | 455                   | A          |                                                |                                 |
| 4                                         | 5               | 136                   | A          | MUCL52445                                      | 1                               |
|                                           |                 | 550                   | T          |                                                |                                 |

|   |    |     |   |           |   |
|---|----|-----|---|-----------|---|
|   |    | 142 | G | HM067686  |   |
|   |    | 325 | A |           |   |
|   |    | 390 | A |           |   |
|   |    | 455 | T |           |   |
|   |    | 550 | C |           |   |
| 5 | 24 | 136 | A | MUCL52450 | 1 |
|   |    | 142 | A | HM067687  |   |
|   |    | 325 | A |           |   |
|   |    | 390 | C |           |   |
|   |    | 455 | T |           |   |
|   |    | 550 | C |           |   |

<sup>1</sup>Three isolates were excluded here, due to low coverage at nucleotide position 136, but matched the first genotype at further SNP positions. <sup>2</sup>Nucleotide Positions in 705 bp PCR product after amplification with EF-1 $\alpha$ F and EF-1 $\alpha$ R, and sequencing with EF-1 $\alpha$ F. <sup>3</sup>Selected reference were described by Scaufaire et al., 2011. <sup>4</sup>Phylogenetic groups 1 and 2 were defined according to the phylogenetic tree presented in Figure 2.

**Table S5.** Accession numbers for reference strains of *Fusarium* used for phylogenetic analysis of *TEF-1 $\alpha$* , *RPB2* and *FUM1*.

| Gene                            | Species                     | Isolate/Strain | Accession number <sup>1</sup> |
|---------------------------------|-----------------------------|----------------|-------------------------------|
| <i>TEF-1<math>\alpha</math></i> | <i>F. temperatum</i>        | MUCL52436      | HM067684.1                    |
| <i>TEF-1<math>\alpha</math></i> | <i>F. temperatum</i>        | MUCL52450      | HM067687.1                    |
| <i>TEF-1<math>\alpha</math></i> | <i>F. temperatum</i>        | MUCL52462      | HM067690.1                    |
| <i>TEF-1<math>\alpha</math></i> | <i>F. subglutinans</i>      | MUCL52468      | HM067691.1                    |
| <i>TEF-1<math>\alpha</math></i> | <i>F. proliferatum</i>      | NRRL 32155     | FJ538242.1                    |
| <i>TEF-1<math>\alpha</math></i> | <i>F. verticillioides</i>   | FRC M-3125     | KF466424.1                    |
| <i>TEF-1<math>\alpha</math></i> | <i>F. pseudograminearum</i> | NRRL28062      | AF212468.1                    |
| <i>RPB2</i>                     | <i>F. verticillioides</i>   | NRRL20956      | MN193901.1                    |
| <i>RPB2</i>                     | <i>F. proliferatum</i>      | DSM62261       | MW118586                      |
| <i>RPB2</i>                     | <i>F. temperatum</i>        | MUCL52463      | MW118585                      |
| <i>RPB2</i>                     | <i>F. subglutinans</i>      | CBS215.76      | MW118584                      |
| <i>RPB2</i>                     | <i>F. sporotrichioides</i>  | DSM62432       | MW118587                      |
| <i>FUM1</i>                     | <i>F. anthropilum</i>       | NRRL25214      | JABEVY010000206.1             |

<sup>1</sup>Nucleotide sequences were obtained from NCBI Genbank.

**Table S6.** Specification of HPLC-MS/MS analysis.

| Toxin | Obtained from                                | Molecular ion      | Parent ion | Product ions   | LOD <sup>A</sup> [mg/kg] | LOQ <sup>A</sup> [mg/kg] |
|-------|----------------------------------------------|--------------------|------------|----------------|--------------------------|--------------------------|
| BEA   | Merck (Darmstadt, Germany)                   | [M+H] <sup>+</sup> | 784.4      | 244.0<br>262.2 | 2.5                      | 20                       |
| MON   | Enzo Life Sciences (Lörrach, Deutschland)    | [M+H] <sup>+</sup> | 97         | 41.1           | 1                        | 2                        |
| FA    | Enzo Life Sciences (Lörrach, Deutschland)    | [M+H] <sup>+</sup> | 180.1      | 162.1<br>134.1 | 0.02                     | 0.1                      |
| FUSA  | Dr. Franz Berthiller (BOKU, Vienna, Austria) | [M+H] <sup>+</sup> | 445.3      | 367.3<br>385.4 | <sup>B</sup>             | -                        |
| FB1   | Merck (Darmstadt, Germany)                   | [M+H] <sup>+</sup> | 722.4      | 352.2<br>334.2 | 3                        | 6                        |
| FB2   | Enzo Life Sciences (Lörrach, Deutschland)    | [M+H] <sup>+</sup> | 706.4      | 318.3<br>336.3 | 5                        | 10                       |
| ENNA1 | Merck (Darmstadt, Germany)                   | [M+H] <sup>+</sup> | 668.4      | 228.2<br>210.2 | 1,5                      | 2                        |
| ENNB  | Merck (Darmstadt, Germany)                   | [M+H] <sup>+</sup> | 640.4      | 527.3<br>196.1 | 1                        | 2,5                      |

<sup>A</sup>LOD and LOQ were estimated according to blank samples of polished rice, inoculated with pure culture medium. <sup>B</sup>No LOD and LOQ were estimated for fusaproliferin.



**Table S7.** Reference strains of *Fusarium* used in this study.

| <b>Strain ID<sup>1</sup></b> | <b>Formae specialis</b>                        | <b>Isolated from</b>    | <b>Country of origin</b> |
|------------------------------|------------------------------------------------|-------------------------|--------------------------|
| NRRL13383                    | <i>F. graminearum</i> Schwabe                  | <i>Zea mays</i>         | Iran                     |
| DSM62261                     | <i>F. proliferatum</i> (Matsushima) Nirenberg  | <i>Cymbidium</i> hybrid | Germany                  |
| DSM62423                     | <i>F. sporotrichioides</i> Sherbakoff          | <i>Pinus nigra</i>      | Germany                  |
| CBS215.76                    | <i>F. subglutinans</i> (Wollenw. & Reinking)   | <i>Zea mays</i>         | Germany                  |
| MUCL52463                    | <i>F. temperatum</i> Scaufaire J. & Munaut F.  | <i>Zea mays</i>         | Belgium                  |
| NRRL20956                    | <i>F. verticillioides</i> (Saccardo) Nirenberg | <i>Zea mays</i>         | USA                      |

<sup>1</sup>Fungal strains were obtained from German Collection of Microorganisms and Cell Cultures, Braunschweig, Germany (DSM); Westerdijk Fungal Biodiversity Institute, Baarn, Holland (CBS); ARS culture collection, Peoria, IL, USA (NRRL); and Dr Jonathan Scaufaire, Earth and Life Institute, Louvain-la-Neuve, Belgium (MUCL).
